# Supplementary material
Source: PubMed Central journal article supplement (PMC3711127)
Supplement: jp4037099_si_001.pdf [file jp4037099_si_001.pdf]

# **Supplementary Information for “Dynamics of self-assembly of model viral capsids in the presence of a fluctuating membrane”**

Richard Matthews\* and Christos N. Likos

*Faculty of Physics, University of Vienna, Boltzmannngasse 5, A-1090 Vienna, Austria*

E-mail: richard.matthews@univie.ac.at

---

\*To whom correspondence should be addressed

We define the various functions used in the interactions between particles and in the confinement of the membrane particles to the frame. The repulsive,  $U_{rep}$ , and attractive,  $U_{att}$ , radial potentials used for inter-sub-unit and sub-unit-membrane interactions are given by,

$$U_{rep}(r) = \begin{cases} 4\epsilon \left[ \left(\frac{\sigma}{r}\right)^{12} - \left(\frac{\sigma}{r}\right)^6 + \frac{1}{4} \right] & \text{for } r < r_t, \\ 0 & \text{for } r \geq r_t, \end{cases} \quad (1)$$

and

$$U_{att}(r) = \begin{cases} -\epsilon & \text{for } r < r_t, \\ 4\epsilon \left[ \left(\frac{\sigma}{r}\right)^{12} - \left(\frac{\sigma}{r}\right)^6 \right] & \text{for } r_t \leq r \leq r_s, \\ a(r - r_c)^2 + b(r - r_c)^3 & \text{for } r_s \leq r \leq r_c, \\ 0 & \text{for } r \geq r_c, \end{cases} \quad (2)$$

where  $r$  is the particle center separation,  $r_t = 2^{1/6}\sigma$ ,  $r_s = (\frac{26}{7})^{1/6}\sigma$ ,  $r_c = \frac{67}{48}r_s$ ,  $a = -\frac{24192}{3211}\frac{\epsilon}{r_s^2}$  and  $b = -\frac{387072}{61009}\frac{\epsilon}{r_s^3}$ . In the range  $r_s \leq r \leq r_c$ , a polynomial interpolation is used for  $U_{att}(r)$  so that the potential goes smoothly to 0.<sup>1</sup>

Patchy interactions are produced by multiplying  $U_{att}$  by  $\gamma_{orient}(\hat{\mathbf{r}}_{ij}, \Omega_i, \Omega_j)$ , where  $\hat{\mathbf{r}}_{ij}$  is the unit vector pointing between the particle centers and  $\Omega_i$  an orientation. For inter-sub-unit interactions,  $\gamma_{orient}$  is composed of three, and for membrane-sub-unit interactions only one, factor of the

following functional form,<sup>2</sup>

$$F(\theta; \theta_0, \theta_1) = \begin{cases} 1 & \text{for } \theta \leq \theta_0, \\ \cos^2[(\pi/2)(\theta - \theta_0)/\theta_1] & \text{for } \theta_0 \leq \theta \leq \theta_0 + \theta_1, \\ 0 & \text{for } \theta \geq \theta_0 + \theta_1, \end{cases} \quad (3)$$

where  $\theta_0$  and  $\theta_1$  are parameters that define patch width.

The bond interaction between two bonded membrane particles,  $i$  and  $j$ , is given by<sup>3</sup>

$$U_{bond}(r_{ij}) = \begin{cases} 0 & \text{for } r_{ij} \leq 1.15l_0, \\ (80k_B T) \exp[1/(1.15l_0 - r_{ij})]/(1.33l_0 - r_{ij}) & \text{for } 1.15l_0 < r_{ij} < 1.33l_0, \\ \infty & \text{for } r_{ij} \geq 1.33l_0, \end{cases} \quad (4)$$

with  $r_{ij} = |\mathbf{r}_{ij}| = |\mathbf{r}_j - \mathbf{r}_i|$ , where  $\mathbf{r}_i$  is position of particle  $i$ . Additionally, an excluded volume

potential is applied between all pairs of membrane particles

$$U_{EV}(r_{ij}) = \begin{cases} \infty & \text{for } r_{ij} \leq 0.67l_0, \\ (80k_B T) \exp[1/(r_{ij} - 0.85l_0)] / (r_{ij} - 0.67l_0) & \text{for } 0.67l_0 < r_{ij} < 0.85l_0, \\ 0 & \text{for } r_{ij} \geq 0.85l_0. \end{cases} \quad (5)$$

These potentials set minimum distance between membrane particles to  $0.67l_0$  and the maximum bond length to  $1.33l_0$ . The total area,  $A$ , of the membrane is constrained with a potential,

$$U_{area} = (k_B T)(A - A_0)^2, \quad (6)$$

where  $A_0 = (\sqrt{3}/4)l_0^2 N_{tri}$  and  $N_{tri}$ , the number of triangles in the membrane surface, may vary. Membrane particles forming the edge of the surface are confined to a frame region, located a distance  $r_{frame}$  into the simulation box. Within a volume of cross-section  $l_0 \times 4l_0$ , where the larger extension is out of the plane in which the membrane would be extended in a stretched configuration, confined membrane particles experience a flat potential of  $E_{frame}$ .  $E_{frame}$  may be used to control the average of  $r_{frame}$  and is set by comparison with tensionless simulations performed with box rescaling.<sup>4</sup> When confined membrane particles move out of the central part of the frame they experience a potential essentially identical to that used for excluded volume,

$$U_{confine}(r) = \begin{cases} E_{frame} + (80k_B T) \exp[-1/r] / (0.18l_0 - r) & \text{for } 0 < r < 0.18l_0, \\ \infty & \text{for } r \geq 0.18l_0, \end{cases} \quad (7)$$

where  $r$  is the distance of the confined membrane particle from the closest point within the flat-potential region.

## References

- (1) Bordat, P.; Reith, D.; Müller-Plathe, F. *J. Chem. Phys.* **2001**, *115*, 8978.
- (2) Miller, W.; Cacciuto, A. *Phys. Rev. E* **2009**, *80*, 021404.
- (3) Noguchi, H.; Gompper, G. *Phys. Rev. E* **2005**, *72*, 11901.
- (4) Matthews, R.; Likos, C. N. *Soft Matter* **2013**, *9*, 5794–5806.
